# Supplementary material for: Bacteria from the Midgut of Common Cockchafer (Melolontha melolontha L.) Larvae Exhibiting Antagonistic Activity Against Bacterial Symbionts of Entomopathogenic Nematodes: Isolation and Molecular Identification
Source: PubMed Central journal article supplement (PMC7013910; doi:10.3390/ijms21020580), 2020-01-16
Supplement: ijms-21-00580-s001.pdf [file ijms-21-00580-s001.pdf]

Supplementary Data

Article

# **Bacteria from the Midgut of Common Cockchafer (*Melolontha melolontha* L.) Larvae Exhibiting Antagonistic Activity Against Bacterial Symbionts of Entomopathogenic Nematodes: Isolation and Molecular Identification**

**Marcin Skowronek <sup>1,\*</sup>, Ewa Sajnaga <sup>1</sup>, Małgorzata Pleszczyńska <sup>2</sup>, Waldemar Kazimierzak <sup>1</sup>, Magdalena Lis <sup>1</sup> and Adrian Wiater <sup>2,\*</sup>**

<sup>1</sup> Laboratory of Biocontrol, Application and Production of EPN, Centre for Interdisciplinary Research, Faculty of Biotechnology and Environmental Sciences, John Paul II Catholic University of Lublin, ul. Konstantynów 1J, 20-708 Lublin, Poland; esajnaga@kul.pl (E.S.); wklublin@tlen.pl (W.K.); mdybala@kul.pl (M.L.)

<sup>2</sup> Department of Industrial and Environmental Microbiology, Faculty of Biology and Biotechnology, Maria Curie-Skłodowska University, ul. Akademicka 19, 20-033 Lublin, Poland; mpleszcz@poczta.umcs.lublin.pl

\* Correspondence: marskow@kul.pl (M.S.); adrianw2@poczta.umcs.lublin.pl (A.W.)

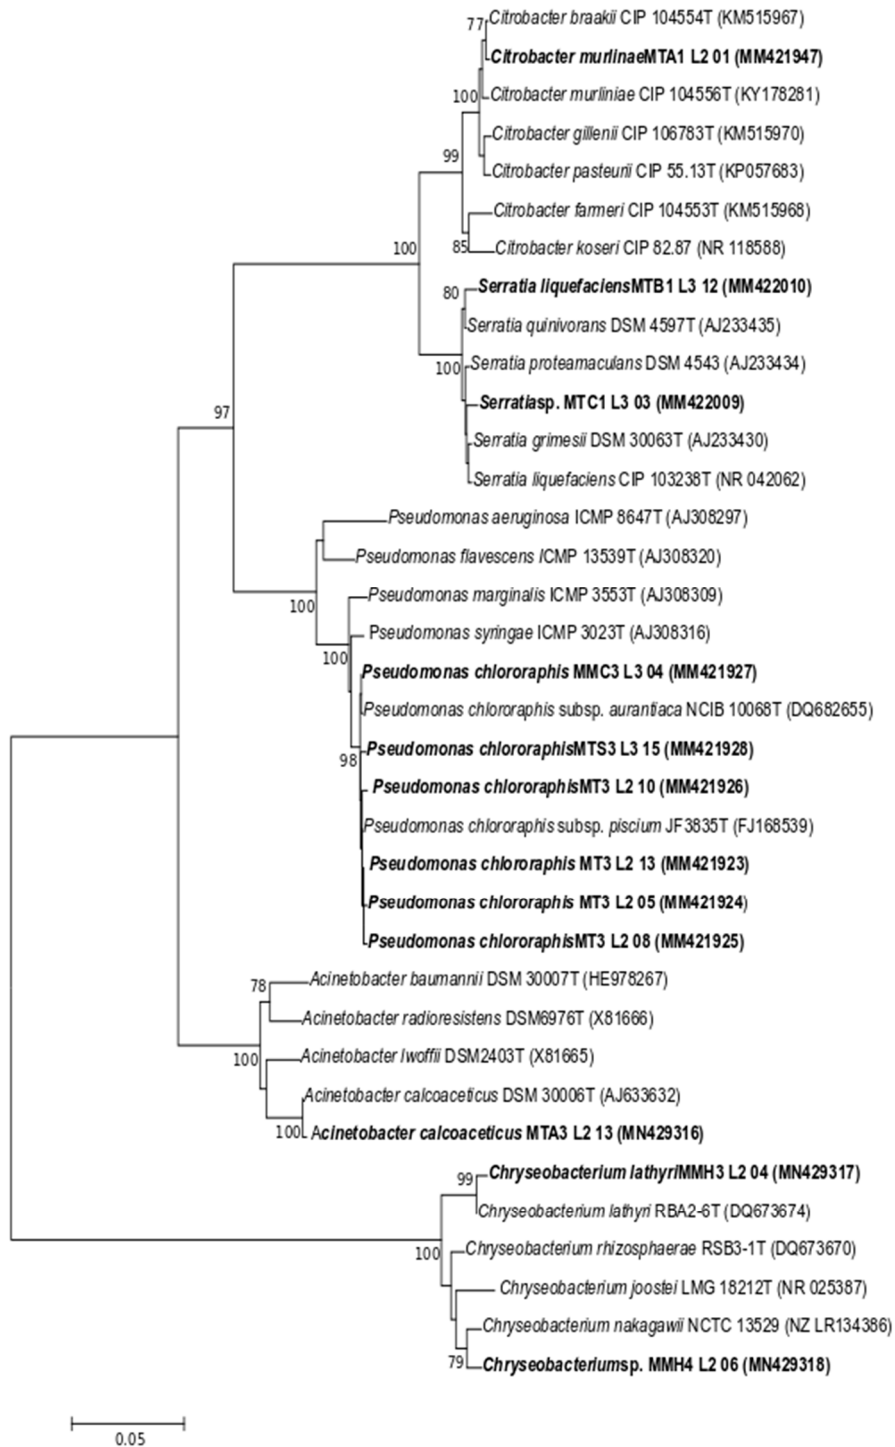

**Figure S1.** Neighbor joining tree based on 16S rRNA gene sequences showing the phylogenetic relationships of the studied *M. melolontha* midgut isolates (bolded) exhibiting antagonistic activity against bacterial symbionts of entomopathogenic nematodes. The GeneBank accession numbers are given in parentheses. The numbers at the branching points are bootstrap values >50%. The bar indicates 0.05 substitution per nucleotide positions.

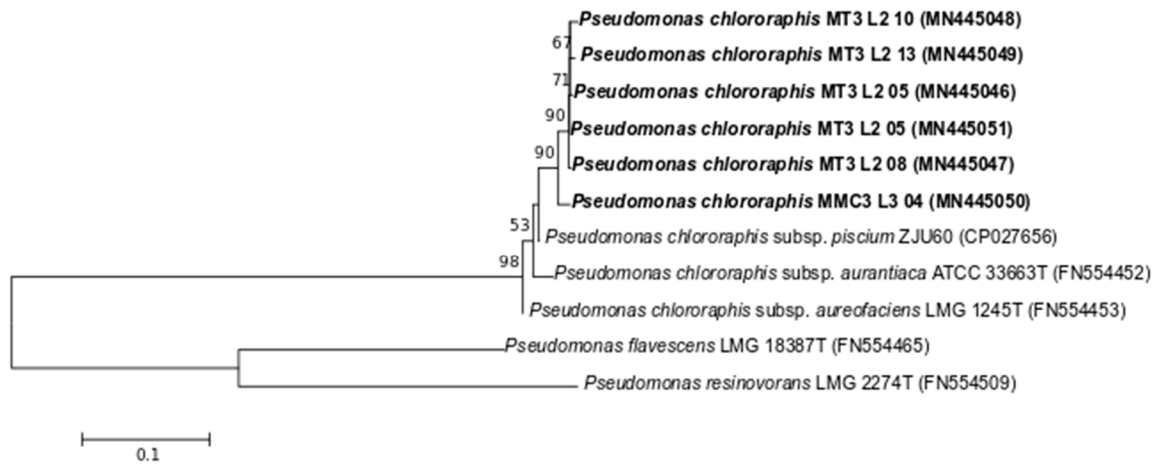

**Figure S2.** Neighbor joining tree based on *rpoD* gene sequences showing the phylogenetic relationships of the studied *M. melolontha* midgut *Pseudomonas* isolates (bolded) exhibiting antagonistic activity against bacterial symbionts of entomopathogenic nematodes. The GeneBank accession numbers are given in parentheses. The numbers at the branching points are bootstrap values >50%. The bar indicates 0.01 substitution per nucleotide positions.

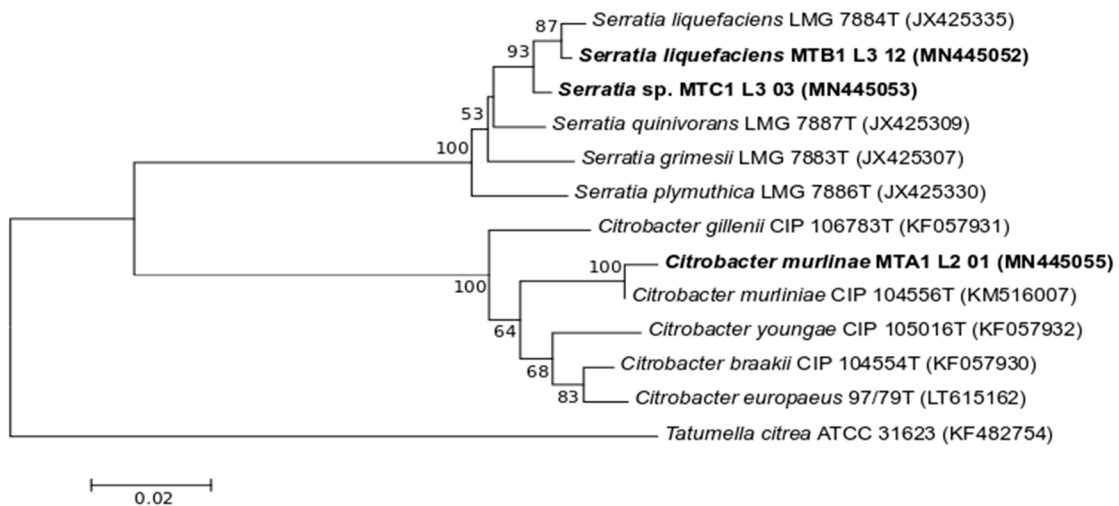

**Figure S3.** Neighbor joining tree based on *rpoB* gene sequences showing the phylogenetic relationships of the studied *M. melolontha* midgut *Serratia* and *Citrobacter* isolates (bolded) exhibiting antagonistic activity against bacterial symbionts of entomopathogenic nematodes. The GeneBank accession numbers are given in parentheses. The numbers at the branching points are bootstrap values >50%. The bar indicates 0.02 substitution per nucleotide positions. The sequence of *Tatumella citrea* was used as an outgroup.

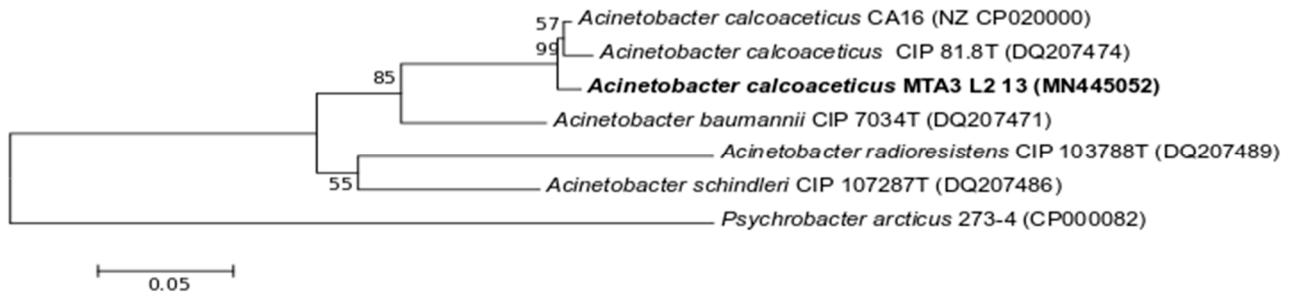

**Figure S4.** Neighbor joining tree based on *rpoB* gene sequences showing the phylogenetic relationships of the studied *M. melolontha* midgut *Acinetobacter* isolate (bolded) exhibiting antagonistic activity against bacterial symbionts of entomopathogenic nematodes. The GeneBank accession numbers are given in parentheses. The numbers at the branching points are bootstrap values >50%. The bar indicates 0.05 substitution per nucleotide positions. The sequence of *Psychrobacter arcticus* was used as an outgroup.

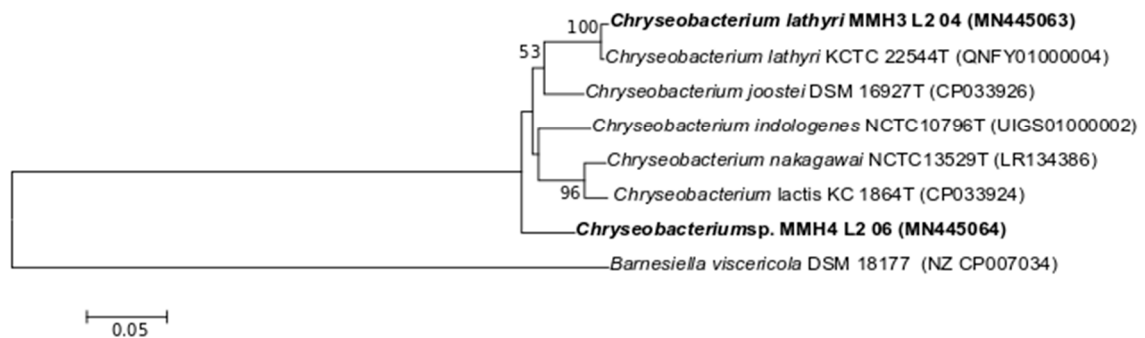

**Figure S5.** Neighbor joining tree based on *rpoB* gene sequences showing the phylogenetic relationships of the studied *M. melolontha* midgut *Chryseobacterium* isolates (bolded) exhibiting antagonistic activity against bacterial symbionts of entomopathogenic nematodes. The GeneBank accession numbers are given in parentheses. The numbers at the branching points are bootstrap values >50%. The bar indicates 0.05 substitution per nucleotide positions. The sequence of *Bamesiella viscericola* was used as an outgroup.

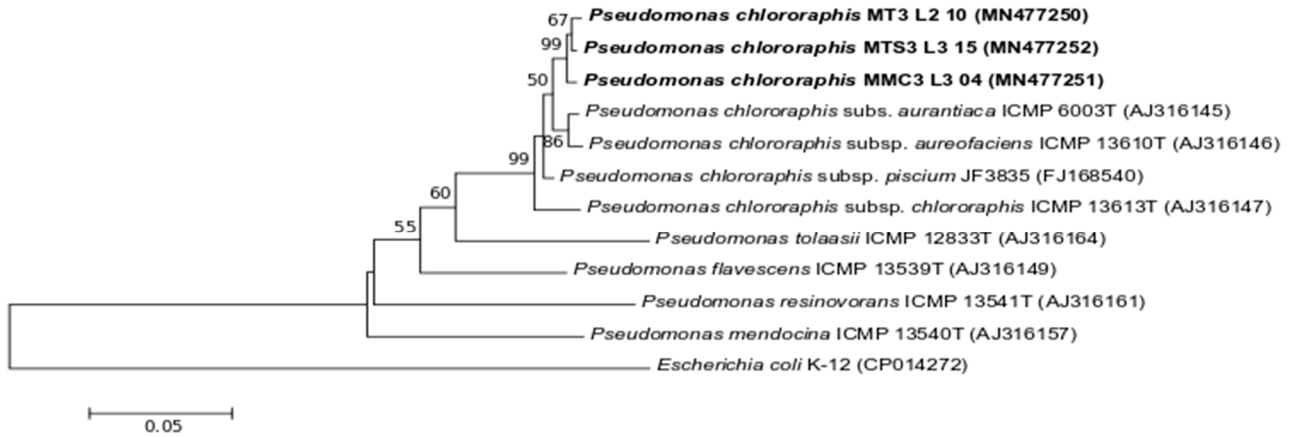

**Figure S6.** Neighbor joining tree based on *recA* gene sequences showing the phylogenetic relationships of the studied *M. melolontha* midgut *Pseudomonas* isolates (bolded) exhibiting antagonistic activity against bacterial symbionts of entomopathogenic nematodes. The GeneBank accession numbers are given in parentheses. The numbers at the branching points are bootstrap values >50%. The bar indicates 0.05 substitution per nucleotide positions. The sequence of *Escherichia coli* was used as an outgroup.
